# Supplementary material for: The Cytotoxic Effect of Copper (II) Complexes with Halogenated 1,3-Disubstituted Arylthioureas on Cancer and Bacterial Cells
Source: MDPI journal article supplement (doi:10.3390/ijms222111415), 2021-10-22
Supplement: s1 [file s1]

Supplementary Materials

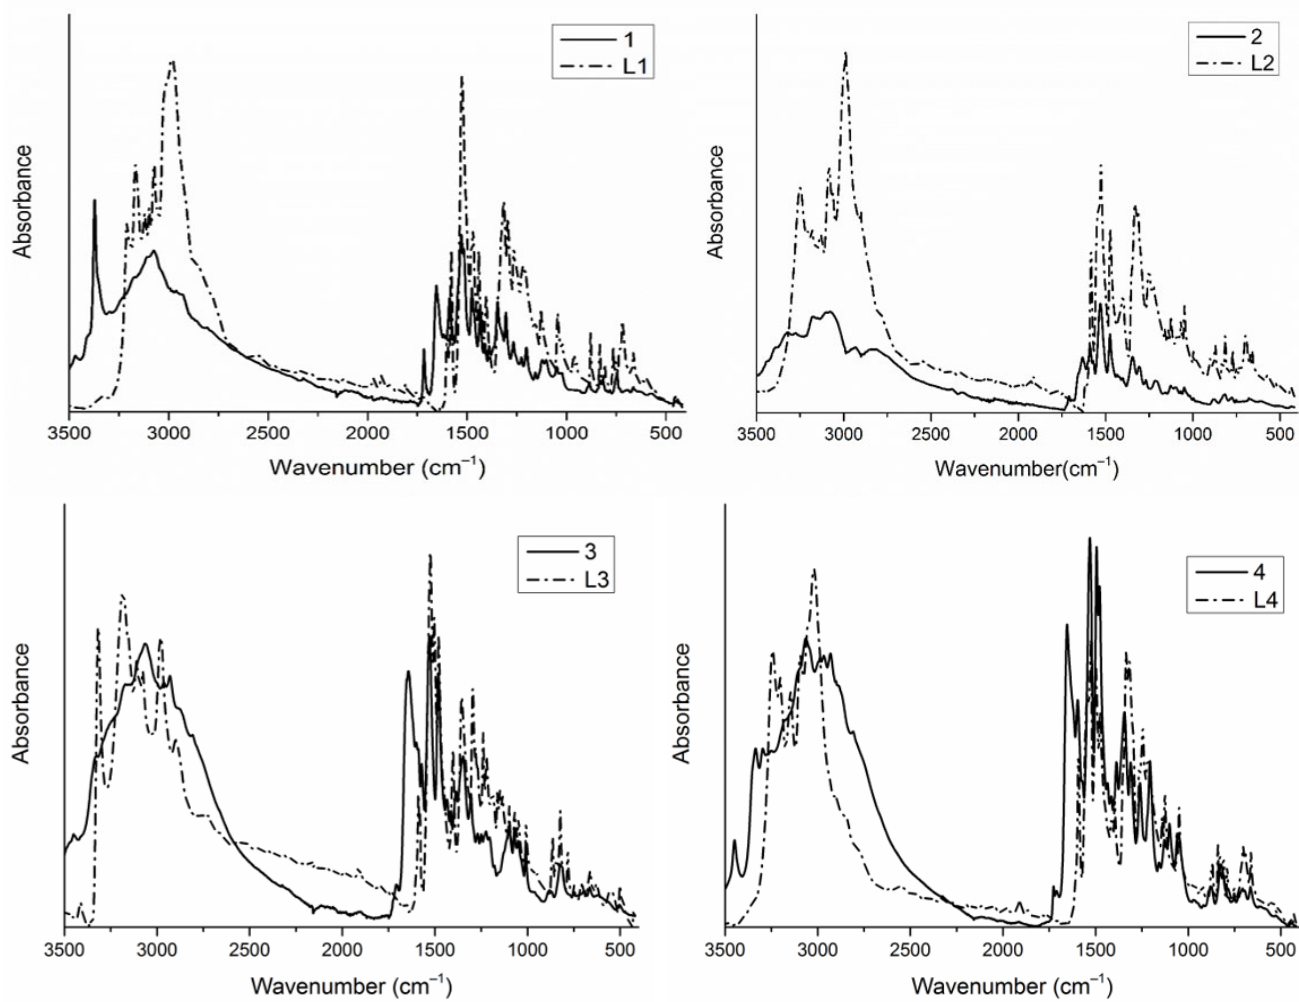

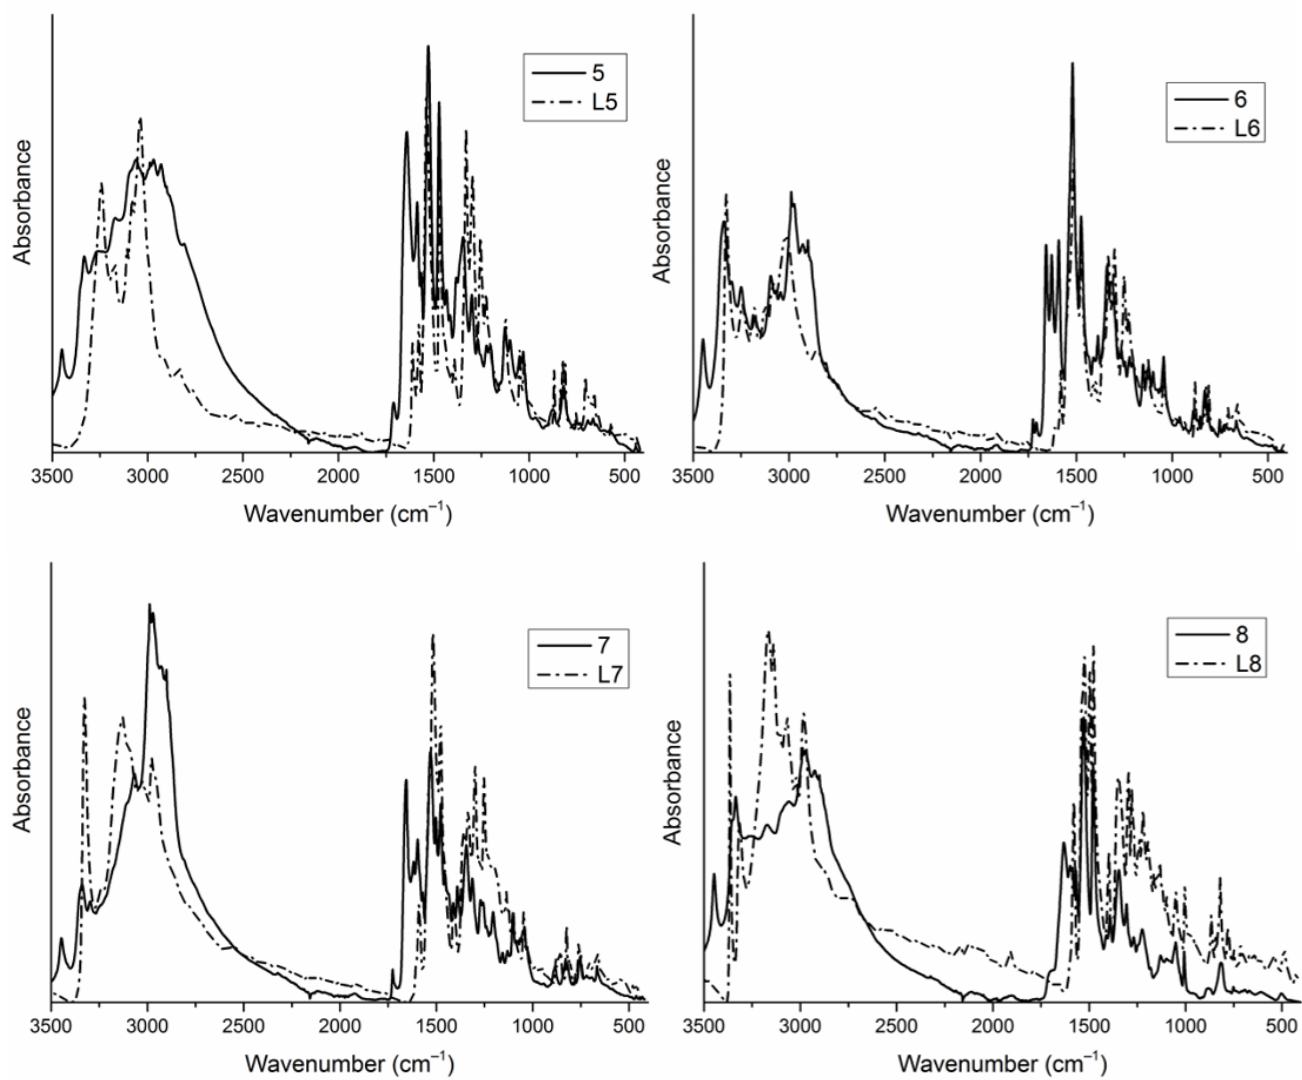

**Figure S1.** ATR-FTIR spectra of Cu(II) complexes (solid line) and parent ligands (dash dot line).

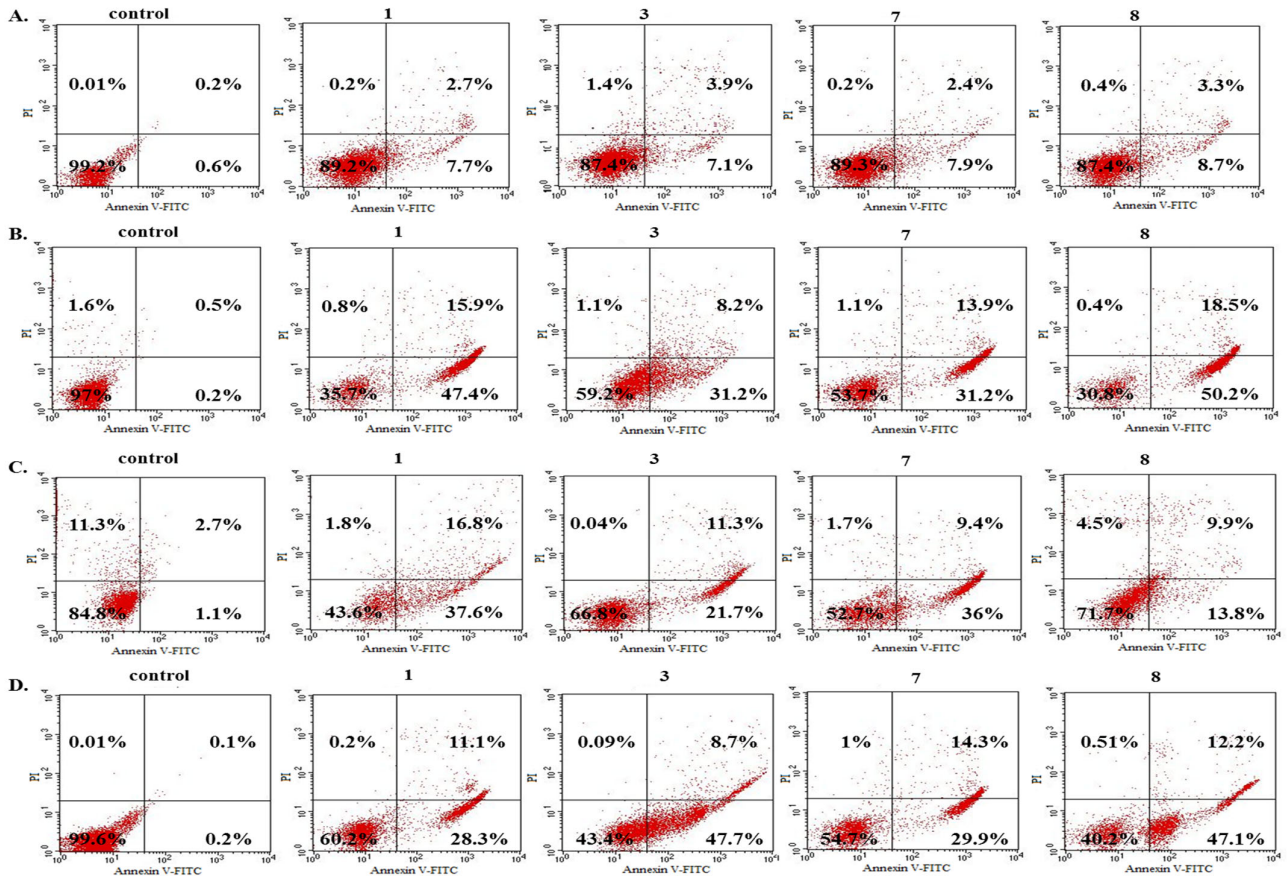

**Figure S2.** The effect of compounds **1**, **3**, **7** and **8** on early and late apoptosis or necrosis in (A.) HaCaT, (B.) SW480, (C.) SW620 and (D.) PC3 cells detected by flow cytometry. Cells were incubated for 72 h with compounds. Diagrams show representative experiments. The lower right quadrant shows early apoptotic cells. The upper right and upper left quadrants represent late stage of apoptotic or necrotic cells.

**Table S1.** LC-MS proteome analysis provided in the SW480, SW620 and PC3 cells treated for 24h with IC<sub>50</sub> concentrations of complexes **1**, **3**, **7** and **8**. Protein intensities were expressed as a mean from three independent experiments.

| Accession   | Name                                                                         | SW480   |       |       |       |       | SW620   |       |       |       |       | PC3     |       |       |       |       |
|-------------|------------------------------------------------------------------------------|---------|-------|-------|-------|-------|---------|-------|-------|-------|-------|---------|-------|-------|-------|-------|
|             |                                                                              | Control | 1     | 3     | 7     | 8     | Control | 1     | 3     | 7     | 8     | Control | 1     | 3     | 7     | 8     |
| GSTA1_HUMAN | Glutathione S-transferase A1 OS=Homo sapiens OX=9606 GN=GSTA1 PE=1 SV=3      | 41323   | 32367 | 35787 | 31245 | 37843 | 91232   | 45787 | 41221 | 33213 | 49567 | 62764   | 52964 | 44321 | 49732 | 46123 |
|             |                                                                              | 4       | 8     | 6     | 5     | 4     |         |       |       |       |       | 0       | 6     | 2     | 3     | 2     |
| GSTO1_HUMAN | Glutathione S-transferase omega-1 OS=Homo sapiens OX=9606 GN=GSTO1 PE=1 SV=2 | 29823   | 21139 | 19686 | 13456 | 15614 | 23211   | 19834 | 17865 | 12188 | 15098 | 34133   | 22175 | 21840 | 23432 | 10799 |
|             |                                                                              | 4       | 8     | 7     | 5     | 5     | 2       | 5     | 7     | 9     | 7     | 7       | 0     | 0     | 3     | 6     |
| GSTP1_HUMAN | Glutathione S-transferase P OS=Homo sapiens OX=9606 GN=GSTP1 PE=1 SV=2       | 36724   | 31134 | 27865 | 29714 | 30478 | 34522   | 25676 | 22254 | 23243 | 19865 | 14251   | 13533 | 72800 | 51019 | 91417 |
|             |                                                                              | 5       | 5     | 6     | 1     | 9     | 1       | 8     | 5     | 3     | 6     | 97      | 19    | 0     | 3     | 3     |
| GSHR_HUMAN  | Glutathione reductase, mitochondrial OS=Homo sapiens                         | 19533   | 11356 | 12321 | 17909 | 14521 | 16234   | 11212 | 12857 | 10924 | 12867 | 15806   | 11236 | 93164 | 96786 | 10822 |
|             |                                                                              | 4       | 7     | 2     | 0     | 2     | 5       | 2     | 5     | 4     | 6     | 4       | 2     |       |       | 1     |

|                             |                                                                                                    |              |       |       |       |       |              |       |       |       |       |              |       |       |       |       |
|-----------------------------|----------------------------------------------------------------------------------------------------|--------------|-------|-------|-------|-------|--------------|-------|-------|-------|-------|--------------|-------|-------|-------|-------|
| OX=9606 GN=GSR<br>PE=1 SV=2 |                                                                                                    |              |       |       |       |       |              |       |       |       |       |              |       |       |       |       |
| SODC_HU                     | Superoxide dismutase                                                                               |              |       |       |       |       |              |       |       |       |       |              |       |       |       |       |
| MAN                         | [Cu-Zn] OS=Homo sapiens OX=9606 GN=SOD1 PE=1 SV=2                                                  | <b>11223</b> | 76586 | 84545 | 45622 | 98955 | <b>12233</b> | 88976 | 95667 | 54678 | 78955 | <b>14294</b> | 83564 | 44174 | 22026 | 47149 |
|                             |                                                                                                    | <b>35</b>    | 8     | 4     | 3     | 6     | <b>56</b>    | 7     | 8     | 8     | 6     | <b>42</b>    | 0     | 6     | 8     | 8     |
| SODM_H                      | Superoxide dismutase                                                                               |              |       |       |       |       |              |       |       |       |       |              |       |       |       |       |
| UMAN                        | [Mn], mitochondrial OS=Homo sapiens OX=9606 GN=SOD2 PE=1 SV=3                                      | <b>78926</b> | 53499 | 61299 | 51399 | 74463 | <b>87534</b> | 77699 | 67515 | 39676 | 81223 | <b>57710</b> | 16812 | 17984 | 14545 | 16960 |
|                             |                                                                                                    | <b>5</b>     | 8     | 0     | 8     | 4     | <b>2</b>     | 8     | 9     | 6     | 4     | <b>1</b>     | 7     | 0     | 6     | 0     |
| Peroxioredoxin-1            |                                                                                                    |              |       |       |       |       |              |       |       |       |       |              |       |       |       |       |
| PRDX1_H                     | OS=Homo sapiens                                                                                    | <b>31223</b> | 29933 | 27629 | 22345 | 26367 | <b>33456</b> | 32167 | 29767 | 27845 | 31277 | <b>24399</b> | 18022 | 11654 | 11354 | 12771 |
| UMAN                        | OX=9606 GN=PRDX1 PE=1 SV=1                                                                         | <b>231</b>   | 676   | 276   | 478   | 811   | <b>762</b>   | 221   | 565   | 632   | 885   | <b>792</b>   | 715   | 561   | 508   | 180   |
| PRDX2_H                     | Peroxioredoxin-2                                                                                   |              |       |       |       |       |              |       |       |       |       |              |       |       |       |       |
| UMAN                        | OS=Homo sapiens                                                                                    | <b>65462</b> | 62485 | 61337 | 45454 | 51234 | <b>72167</b> | 66475 | 51687 | 42273 | 63967 | <b>54541</b> | 23045 | 25818 | 92    | 17587 |
|                             | OX=9606 GN=PRDX2 PE=1 SV=5                                                                         | <b>84</b>    | 67    | 78    | 32    | 36    | <b>64</b>    | 86    | 73    | 45    | 14    | <b>13</b>    | 72    |       | 27    | 18    |
| PRDX3_H                     | Thioredoxin-dependent peroxide reductase, mitochondrial OS=Homo sapiens OX=9606 GN=PRDX3 PE=1 SV=3 | <b>81212</b> | 77345 | 69394 | 73384 | 78232 | <b>92345</b> | 64574 | 62345 | 56487 | 87867 | <b>76427</b> | 53144 | 43764 | 94596 | 18928 |
| UMAN                        |                                                                                                    | <b>43</b>    | 23    | 54    | 76    | 34    | <b>4</b>     | 4     | 1     | 8     | 9     | <b>9</b>     | 4     | 3     |       | 5     |
| PRDX4_H                     | Peroxioredoxin-4                                                                                   |              |       |       |       |       |              |       |       |       |       |              |       |       |       |       |
| UMAN                        | OS=Homo sapiens                                                                                    | <b>65498</b> | 44286 | 39359 | 38209 | 51244 | <b>54562</b> | 43345 | 41672 | 39825 | 51232 | <b>29707</b> | 21556 | 18138 | 10610 | 91449 |
|                             | OX=9606 GN=PRDX4 PE=1 SV=1                                                                         | <b>71</b>    | 16    | 87    | 01    | 76    | <b>23</b>    | 76    | 34    | 63    | 34    | <b>23</b>    | 87    | 10    | 38    | 9     |
| PRDX5_H                     | Peroxioredoxin-5, mitochondrial OS=Homo sapiens OX=9606 GN=PRDX5 PE=1 SV=4                         | <b>14534</b> | 11234 | 12329 | 13224 | 11876 | <b>11212</b> | 98987 | 92343 | 91234 | 83456 | <b>95228</b> | 27866 | 38969 | 34956 | 39955 |
| UMAN                        |                                                                                                    | <b>56</b>    | 51    | 82    | 54    | 76    | <b>32</b>    | 3     | 4     | 3     | 7     | <b>1</b>     | 2     | 4     | 4     | 5     |
| PRDX6_H                     | Peroxioredoxin-6                                                                                   |              |       |       |       |       |              |       |       |       |       |              |       |       |       |       |
| UMAN                        | OS=Homo sapiens                                                                                    | <b>87655</b> | 65789 | 71222 | 59876 | 62345 | <b>98939</b> | 82345 | 65678 | 66787 | 76782 | <b>59129</b> | 39365 | 42064 | 20707 | 31771 |
|                             | OX=9606 GN=PRDX6 PE=1 SV=3                                                                         | <b>78</b>    | 81    | 34    | 78    | 41    | <b>37</b>    | 64    | 78    | 23    | 23    | <b>81</b>    | 03    | 39    | 29    | 20    |

**Table S2.** Genotoxic activity of tested complexes – inhibition zone diameter (mm).

| Compound | <i>Bacillus subtilis</i> strain |     |
|----------|---------------------------------|-----|
|          | H17                             | M45 |
| 1        | 12                              | 12  |
| 2        | 17                              | 19  |
| 3        | 15                              | 15  |
| 4        | 16                              | 18  |
| 5        | 17                              | 18  |
| 6        | 16                              | 15  |

|      |    |    |
|------|----|----|
| 7    | 15 | 18 |
| 8    | 14 | 14 |
| NOQ* | 13 | 25 |

\*NOQ – 4-Nitroquinoline-N-oxide

### DMF effect on cell lines

The cytotoxic effect of DMF towards cancer, normal and bacterial cells, as other popular solvents, was tested before by various scientific teams [1S-4S]. It seems to act on cells metabolism only when used in millimolar concentration, whereas IC<sub>50</sub> of our active compounds was below 10  $\mu$ M (and the highest IC<sub>50</sub> found equaled 120  $\mu$ M). As calculated, approximated concentration of DMF in a culture medium in MTT test, included with our complexes (for example complex 1, bounded with 0.75 mole of DMF) varied from 2  $\mu$ M = 0.002 mM (SW 480 cells) to nearly 82  $\mu$ M = 0.08 mM (HaCaT cells). Concerning bacterial studies, DMF might be found in a medium at maximum concentration (equaled MIC = 4  $\mu$ g/ml for the most active compounds) of 0.004  $\mu$ M up to 0.12  $\mu$ M. The effect of DMF on bioactivity in our tests is negligible, because we use micromolar, not millimolar amounts of substances. The impact of DMF on cell lines was also studied previously as follows:

#### 1. effect on HaCaT cells and cancer cells [1]

In the experiments performed by Authors of that paper, DMF influenced HaCaT cells at concentration of 0.14 mg/ml (2 mM), and cancer cells applied at 1.8-9.5 mM. In our experiments, HaCaT cell were treated with 0.08 mM DMF (bounded with a complex 1) or maximum 0.1 mM for other complexes.

#### 2. effect on colon cancer cells [2]

According to Authors, DMF exerted no cytotoxic effect towards colon cancer cells and inhibits cell proliferation by 40-50% at 80  $\mu$ M (our complexes 1 and 8, at 4  $\mu$ M caused apoptosis of SW480 cells in 47%). DMF at 100  $\mu$ M did not increase LDH release from colon cancer cells, as compared to our derivative 8 (used at 60  $\mu$ M, max. concentration of DMF 45  $\mu$ M), which achieved 64% LDH release in PC3 cells, and 58% in SW480 cell lines.

#### 3. effect on pancreatic cancer cells [3]

According to Authors, DMF caused 85% apoptosis of PC3 cells when applied at concentration of 200  $\mu$ M, and PANC-1 in 30% (at 100  $\mu$ M). Our complexes gave proapoptotic effect in their IC<sub>50</sub> concentrations, i.e. 4-10  $\mu$ M.

#### 4. effect on bacterial cells [4]

In the experiments performed by Authors of that paper (Table 2), the number of living bacterial cells in the presence of DMF applied in 4.8% (v/v), i.e. about 60 mM, varied from 0.1 to 8.9%. Approximated concentration of DMF in our medium was only from 0.004  $\mu$ M to 0.12  $\mu$ M.

### References

1. Ilieva, Y.; Dimitrova, L.; Zaharieva, M.M.; Kaleva, M.; Alov, P.; Tsakovska, I.; Pencheva, T.; Pencheva-El Tibi, I.; Najdenski, H.; Pajeva, I. Cytotoxicity and Microbicidal Activity of Commonly Used Organic Solvents: A Comparative Study and Application to a Standardized Extract from *Vaccinium macrocarpon*. *Toxics* **2021**, *9*, 92. <https://doi.org/10.3390/toxics9050092>
2. Kaluzki, I.; Hailemariam-Jahn, T.; Doll, M.; Kaufmann, R.; Balermipas, P.; Zöller, N.; Kippenberger, S.; Meissner, M. Dimethylfumarate Inhibits Colorectal Carcinoma Cell Proliferation: Evidence for Cell Cycle Arrest, Apoptosis and Autophagy. *Cells* **2019**, *8*, 1329. <https://doi.org/10.3390/cells8111329>
3. Chen, K.; Wu, S.; Ye, S.; Huang, H.; Zhou, Y.; Zhou, H.; Wu, S.; Mao, Y.; Shangguan, F.; Lan, L.; Chen, B. Dimethyl Fumarate Induces Metabolic Crisis to Suppress Pancreatic Carcinoma. *Front. Pharmacol.* **2021**, *12*, 617714. <https://doi.org/10.3389/fphar.2021.617714>
4. Dyrda, G.; Boniewska-Bernacka, E.; Man, D.; Barchiewicz, K.; Słota, R. The effect of organic solvents on selected microorganisms and model liposome membrane. *Mol. Biol. Rep.* **2019**, *46*(3), 3225–3232. <https://doi.org/10.1007/s11033-019-04782-y>
